# Supplementary material for: Autosomal dominant macular dystrophy associated with THRB: identification of new families and variants
Source: Research Square preprint supplement (doi:10.21203/rs.3.rs-5415667/v1), 2024-12-16
Supplement: Supplementary file 1 [file 159dd72e1a046a3e4fff4ae0.docx]

| **Variant information** | **Reference** | **chr3-24231564-C-T** | **chr3-24231565-C-T** |
| --- | --- | --- | --- |
| **Exon/Intron** | Intron 5 | Exon 5 |
| **Nucleotide change** | NM_001354712.2: c.283+1G>A | NM_001354712.2: c.283G>A |
| **Protein change** | NP_001341641.1: p.? | NP_001341641.1: p.Gly95Arg |
| **Type of variant** | Splicing | Missense/Splicing |
| **Population Frequencies and Database** | **gnomAD** | Not found | Not found |
| **ClinVar** | Pathogenic | Not found |
| **LOVD** | Not found | Not found |
| **Splicing predictions** | **spliceAI_DL** | 0.98 (at -1 bp) | 0.73 (at 0 bp) |
| **spliceAI_DG** | 0.24 (at -7 bp) | 0.08 (at -6 bp) |
| **spliceAI_AL** | 0.48 (at -261 bp) | 0.43 (at -260 bp) |
| **spliceAI_AG** | 0 | 0 |
| **MaxEntScan_5'ss_cano_WT** | 9.24 | 9.24 |
| **MaxEntScan_5'ss_cano_MT** | 1.06 | 2.93 |
| **MaxEntScan_5'ss_aber_WT** | 0.58 | 0.58 |
| **MaxEntScan_5'ss_aber_MT** | 0.58 | -0.78 |
| **SPiP_interpretation** | Alteration of the consensus splice site | Alteration of the consensus splice site |
| **SPiP_risk** | 98.41 % [91.47 % - 99.96 %] | 98.41 % [91.47 % - 99.96 %] |
| **dbscSNV_ADA** | 1 | 1 |
| **dbscSNV_RF** | 0.94 | 1 |
| **Overall predictions** | **MPA score** | 10 (high impact) | 10 (high impact) |
| **MPA impact** | Clinvar pathogenic | High missense |
| **CADD_phred** | 34 | 35 |
| **REVEL** | - | 0.75 (D) |
| **SIFT** | - | 0.001 (D) |
| **Polyphen 2 HumDiv** | - | 0.998 (PD) |
| **Polyphen 2 HumVar** | - | 0.947 (PD) |
| **Fathmm** | - | -3.3 (D) |
| **AlphaMissense** | - | 0.963 (LP) |
| **ClinPred** | - | 0.961 (D) |
| **Meta SVM** | - | 0.9848 (D) |
| **Meta LR** | - | 0.8944 (D) |
| **Mistic** | - | 0.80 (D) |
| **ACMG classification** | | P (PS4, PVS1, PM2, PP1, PP3, PP5) | P (PS4, PM1, PM2, PP1, PP2, PP3) |
| **Reference** | | Fernández-Suárez *et al.*, 2023 | **This study** |

**Table 2. Annotation and pathogenicity predictions of *THRB* variants found in our IRD-cohort.** D: damaging; PD: probably damaging; LP: likely pathogenic; P: pathogenic; ACMG: American College of Medical Genetics guidelines.
