# Supplementary material for: Autosomal dominant macular dystrophy associated with THRB: identification of new families and variants
Source: Research Square preprint supplement (doi:10.21203/rs.3.rs-5415667/v1), 2024-12-16
Supplement: Supplementary file 2 [file 5f7751357ac3e14757505e40.docx]

| **Family** | **Patient** | ***THRB* variant** | **Other P/LP IRD genes variants identified** | **Gender** | **Initial**  **diagnosis** | **Disease onset** | **First symptoms** | **Other visual symptoms** | **Ophthalmologic examination** | | | **Age of last ophthalmologic examination** | **Endocrine disorder** | **Extraocular manifestations** |
| --- | --- | --- | --- | --- | --- | --- | --- | --- | --- | --- | --- | --- | --- | --- |
| **Fundus images and FAF** | **SD-OCT** | **Electrophisiology** |
| Family 1 | III:1 | *THRB*  (NM_001354712.2): c.283+1G>A | NGS not performed | Male | MD | NA | NA | Visual acuity loss  Central visual field loss | Hyperpigmentation of macular RPE. | Disruption of subfoveal ellipsoid layers. | NA | 66 years old | Normal levels of TSH and THs. | - |
| III:4 | NGS not performed | Female | IRD | NA | NA | NA | NA | NA | NA | - | No endocrine disorder observed. | - |
| IV:2 | *ABCA4*  (NM_000350.2): c.4253+43G>A (het) | Male | MD | Early childhood | Visual acuity loss  Dyschromatopsia | Nyctalopia | Central hypoautofluorescence with surrounding hyperautofluorescence. | Disruption of subfoveal ellipsoid layers. | FF-ERG: Cone dysfunction  P-ERG: Macular dysfunction | 43 years old | Normal levels of TSH and THs. | Behavior disorder, epilepsy secondary to perinatal hypoxia |
| IV:4 | NGS not performed | Female | MD | Adolescence | Visual acuity loss | - | Macular alterations | Disruption of subfoveal ellipsoid layers. | NA | 31 years old | No endocrine disorder observed. | - |
| Family 2 | II:4 | *THRB*  (NM_001354712.2): c.283+1G>A | None | Female | MD | 6 years old | Visual acuity loss  Central visual field loss | Dyschromatopsia  Visual field loss  Photophobia | Central hyperautofluorescence. | Disruption of subfoveal ellipsoid layers. | FF-ERG: Cone dysfunction  P-ERG: Macular dysfunction | 51 years old | Normal levels of TSH and THs. | - |
| Family 3 | III:4 | *THRB*  (NM_001354712.2): c.283G>A | NGS not performed | Male | MD | 65 years old | Visual acuity loss | - | Macula with a granular appearance. | Disruption of subfoveal ellipsoid layers. | NA | 72 years old | No endocrine disorder observed. | - |
| III:7 | NGS not performed | Male | MD | 53 years old | Dyschromatopsia | Visual acuity loss (likely secondary to cataract formation) | Central hyperautofluorescence. | Disruption of subfoveal ellipsoid layers with optic gap. | FF-ERG: Normal limits.  P-ERG: Macular dysfunction | 59 years old | No endocrine disorder observed. | - |
| IV:1 | None | Male | MD | 35 years old | Visual acuity loss | Dyschromatopsia, Central visual field loss  Photophobia | Central hyperautofluorescence. | Disruption of subfoveal ellipsoid layers. | FF-ERG: No evidence of generalized photoreceptor dysfunction  P-ERG: Macular dysfunction | 47 years old | Normal levels of TSH and THs. | - |
| IV:7 | *CABP4*  (NM_145200.5):  c.66dupT; p.Ala23Cysfs*9 (het) | Female | MD | 28 years old | Visual acuity los  Dyschromatopsia  Photophobia  Nyctalopia | - | NA | Disruption of subfoveal ellipsoid layers. | NA | 38 years old | Normal levels of TSH and THs. | - |
| IV:9 | None | Female | MD | NA | NA | NA | Macula with a granular appearance. | Disruption of subfoveal ellipsoid layers. | NA | 39 years old | Normal levels of TSH and THs. | - |
| IV:12 | NGS not performed | Female | MD | 26 years old | Visual acuity loss | Photophobia  Dyschromatopsia  Central visual field loss  Nyctalopia | Mild loss of the normal central macular hypoautofluorescence | Disruption of subfoveal ellipsoid layers with optic gap. | NA | 30 years old | Normal levels of TSH and THs. | - |
| V:3 | NGS not performed | Female | MD | 7 years old | Visual acuity loss  Photophobia Photopsias | - | Central hyperautofluorescence. | Disruption of subfoveal ellipsoid layers. | FF-ERG: no evidence of generalized photoreceptor dysfunction  P-ERG: NA | 9 years old | Normal levels of TSH and THs. | - |

**Table 1. Ophthalmologic data of patients carrying pathogenic *THRB* variants in our IRD-cohort.** MD: macular dystrophy; IRD: inherited retinal dystrophy; P/LP: pathogenic/likely pathogenic; het: heterozygous; FAF: fundus autofluorescence; RPE: retinal pigment epithelium; NA: not available; VAL: visual acuity loss; VFL: visual field loss; NB: night blindness; FF-ERG: full field electroretinogram; P-ERG: pattern electroretinogram; TSH: thyroid-stimulating hormone; THs: thyroid hormone.
